1 **Endothelial and non-endothelial responses to estrogen excess during**  
2 **development lead to vascular malformations**

3

4 Silvia Parajes, Sophie Ramas and Didier Y.R. Stainier

5

6 Department of Developmental Genetics, Max Planck Institute for Heart and Lung

7 Research, Bad Nauheim, Germany.

8

9

10 **Short title:** Estrogenic responses leading to vascular defects (max 50 characters)

11

12 **Corresponding author:**

13 Didier Stainier

14 [Didier.Stainier@mpi-bn.mpg.de](mailto:Didier.Stainier@mpi-bn.mpg.de)

15 Department of Developmental Genetics, Max Planck Institute for Heart and Lung

16 Research, Ludwigstrasse 43, Bad Nauheim, 61231, Germany.

17

18 **Word count:** 7849

19

20 **Subject codes:** angiogenesis, animal models of human disease, mechanisms,

21 vascular biology.

22

23

24

25

26

27

28 **ABSTRACT**

29

30 Excess estrogen signaling is associated with vascular malformations and pathologic  
31 angiogenesis, as well as tumor progression and metastasis. Yet, how dysregulated  
32 estrogen signaling impacts vascular morphogenesis *in vivo* remains elusive. Here  
33 we use live imaging of zebrafish embryos to determine the effects of excess estrogen  
34 signaling on the developing vasculature. We find that excess estrogens during  
35 development induce intersegmental vessel defects, endothelial cell-cell  
36 disconnections, and a shortening of the circulatory loop due to arterial-venous  
37 segregation defects. Whole-mount *in situ* hybridization and qPCR analyses reveal  
38 that excess estrogens negatively regulate Sonic hedgehog (Hh)/Vegf/Notch  
39 signaling. Activation of Hh signaling with SAG partially rescues the estrogen-induced  
40 vascular defects. Similarly, increased *vegfaa* bioavailability, using *flt1/vegfr1* mutants  
41 or embryos overexpressing *vegfaa*<sub>165</sub>, also partially rescues the estrogen-induced  
42 vascular defects. We further find that excess estrogens promote aberrant endothelial  
43 cell (EC) migration, possibly as a result of increased PI3K and Rho GTPase  
44 signaling. Using estrogen receptor mutants and pharmacological studies, we show  
45 that Esr1 and the G-protein coupled estrogen receptor (Gper1) are the main  
46 receptors driving the estrogen-induced vascular defects. Mosaic overexpression of  
47 *gper1* in ECs promotes vascular disconnections and aberrant migration, whereas no  
48 overt vascular defects were observed in mosaic embryos overexpressing wild-type or  
49 constitutively active nuclear estrogen receptors in their ECs. In summary,  
50 developmental estrogen excess leads to a mispatterning of the forming vasculature.  
51 Gper1 can act cell-autonomously in ECs to cause disconnections and aberrant  
52 migration, whilst Esr signaling predominantly downregulates Hh/Vegf/Notch signaling  
53 leading to impaired angiogenesis and defective arterial-venous segregation.

54

55

56 **Key words:** estrogens, angiogenesis, cardiovascular disease, development,

57 vascular malformations

58

## 59 INTRODUCTION

60 Vascular development is largely conserved across species, and studies in fish, birds  
61 and mammals have brought significant understanding into the main molecular  
62 mechanisms orchestrating vascular morphogenesis<sup>1</sup>. Notochord-derived sonic  
63 hedgehog (HH) induces vascular endothelial growth factor A (*Vegfa*) expression in  
64 the ventral somites. VEGFA, via activation of kinase insert domain receptor  
65 (KDR/VEGFR2), orchestrates angioblast differentiation and proliferation, as well as  
66 vasculogenesis and angiogenesis during development and disease<sup>1,2</sup>. VEGFA-  
67 dependent activation of phosphatidylinositol 3-kinase (PI3K)/AKT and the mitogen-  
68 activated kinase (MAPK) pathways activates the Rho family of small GTPases Rac1,  
69 Cdc42 and RhoA, to promote directional migration<sup>3,4</sup>. Furthermore, VEGF signaling  
70 promotes arterial specification by inducing endothelial *Dll4* expression and activation  
71 of Notch signaling<sup>1,5</sup>. Studies in zebrafish have shown that expression of the arterial  
72 and venous markers EphrinB2 (*efnb2a*) and EphB4 (*ephb4a*), respectively, in the  
73 dorsal aorta (DA) primordium is required for controlled ventral sprouting and arterial-  
74 venous segregation<sup>6</sup>. Importantly, dysregulation of VEGFA signaling and  
75 downstream effectors leads to vascular defects, hence, hampering adequate nutrient  
76 and oxygen supply to irrigated tissues. *Vegfa* haploinsufficiency impairs  
77 angiogenesis and vasculogenesis and is embryologic lethal in mice. Furthermore,  
78 reduced Notch signaling induces arterial-venous malformations and promotes  
79 endothelial hypersprouting during angiogenesis<sup>1,5</sup>. Hence, tight regulation of these  
80 signaling pathways is essential for the formation of a functional vascular system.

81 Estrogens are sex steroid hormones promoting capillary formation and angiogenesis  
82<sup>7-9</sup>. 17 $\beta$ -estradiol (E2), the most potent endogenous estrogen, exerts its biological  
83 action via two nuclear estrogen receptors ESR1 (ER $\alpha$ ) and ESR2 (ER $\beta$ ), and the G  
84 protein-coupled estrogen receptor GPER1. Classical estrogen signaling involves  
85 translocation of ESR1 and ESR2 into the nucleus, where they modulate gene

86 transcription by directly binding to estrogen responsive elements (ERE) present in  
87 the promoter of target genes, or acting as co-factors of other transcription factors<sup>10</sup>.  
88 Physiological nuclear ESR1 signaling induces transcriptional activation of *VEGFA*  
89 and *VEGFR2*<sup>7,11</sup>. In addition, non-genomic estrogen signaling promotes EC and  
90 progenitor EC (PEC) migration *in vitro* by inducing nitric oxide (NO) synthesis<sup>12</sup>,  
91 synergizing with tyrosine kinase receptor signaling, or via interaction with PI3K or  
92 MAPK pathways and RhoA activation<sup>8,13–15</sup>.

93 The significance of estrogen signaling in vascular morphogenesis is further  
94 supported by studies using genetic models of estrogen deficiency showing deficient  
95 ischemia reperfusion in *Esr1* knockout mice<sup>16–20</sup>. On the other hand, increased  
96 estrogen levels in patients with liver disease are associated with a higher prevalence  
97 of angiomas<sup>21</sup>. Furthermore, increased fetal lethality and placental hemorrhage has  
98 been reported in two genetic models of excess estrogen in mouse<sup>22,23</sup>. In both  
99 cases, embryonic lethality was preceded by an increase in estrogen levels. Similar  
100 findings were reported when injecting E2 in pregnant mice<sup>22</sup>. In addition to genetic  
101 conditions leading to estrogen excess, a large number of endocrine disruptors with  
102 estrogenic activity are present in the environment<sup>24</sup>. However, studies into the  
103 molecular and cellular responses to excess estrogen signaling in the forming  
104 vasculature and its role in the etiology of pathologic angiogenesis, are still scarce.

105 Here, combining single-cell resolution microscopy together with genetic and  
106 pharmacologic studies, we found that excess estrogen induces a mispatterning of the  
107 forming vasculature. Vascular defects were a result of antiangiogenic cues due to a  
108 negative regulation of the Hh/Vegf/Notch signaling pathways, and exacerbated EC  
109 migration due to synergisms with PI3K and Rho GTPases signaling pathways. The  
110 E2-induced vascular malformations were more prominently mediated by *Esr1* and  
111 *Gper1*. Finally, we also found that *Gper1* can act cell-autonomously to induce EC  
112 migration and cell-cell disconnections, whilst nuclear estrogen signaling appears to

113 act in non-endothelial cells. Altogether, our findings are of broad translational  
114 significance in endocrine and vascular diseases. Importantly, this study also reveals  
115 complex autocrine and paracrine responses to excess estrogen action cooperating in  
116 the developmental programming of vascular disease.

117

118

## 119 MATERIAL AND METHODS

### 120 1. Transgenic zebrafish lines and animal husbandry

121 All zebrafish husbandry was performed under standard conditions in accordance with  
122 institutional (MPG) and national ethical and animal welfare guidelines. Wild-type AB  
123 zebrafish and the previously established zebrafish lines *Tg(kdrl:NLS-mCherry)<sup>is4</sup>*<sup>25</sup>,  
124 *TgBAC(cdh5:GAL4FF)<sup>mu101</sup>*<sup>26</sup>, *Tg(UAS:LIFEACT-GFP)<sup>mu271</sup>*<sup>27</sup>, *Tg(kdrl:EGFP)<sup>s843</sup>*<sup>28</sup>,  
125 *TgBAC(etv2:EGFP)<sup>ci1</sup>*<sup>29</sup>, *Tg(hsp70l:vegfaa<sub>165</sub>,cryaa:cerulean)<sup>s712</sup>*<sup>30</sup>,  
126 *Tg(5xERE:GFP)<sup>c262</sup>*<sup>31</sup>, *kdrl<sup>hu5088</sup>*<sup>32</sup>, *flt1<sup>bns29</sup>*<sup>33</sup>, and *vegfaa<sup>bns1</sup>*<sup>34</sup> were used in this  
127 study. To improve readability, *TgBAC(cdh5:GAL4FF)*; *Tg(UAS:LIFEACT-GFP)* was  
128 simplified to *LIFEACT-GFP*, and *Tg(kdrl:NLS-mCherry)* is referred to as *NLS-*  
129 *mCherry*. Zebrafish embryos were obtained from natural spawning of the  
130 aforementioned zebrafish lines and raised at 28 C in egg water.

### 131 2. Chemical treatments

132 Chemical treatments of zebrafish embryos were conducted as described in  
133 supplementary methods.

### 134 3. Gene expression analyses

135 Twenty vehicle or E2-treated embryos were collected at 30 hpf in 400 µL of Trizol®  
136 (Thermo Fisher Scientific, Schwerte, Germany) for total RNA extraction. RT-PCR  
137 was performed using 3 µg of RNA and the Maxima First Strand cDNA Synthesis Kit.  
138 Synthesized cDNA was DNaseI treated (Thermo Fisher Scientific). qPCR was  
139 performed using DyNAmo ColorFlash SYBR Green (Thermo Fisher Scientific), 0.5  
140 µL cDNA and 300 nM primers in a CFX Connect™ Real-Time System (Bio-Rad  
141 GmbH, München, Germany). Expression studies were conducted in at least 3  
142 biological replicates. *rpl13* and *elfa* were used as housekeeping genes. Gene  
143 expression was normalized to control using the  $2^{-\Delta\Delta Ct}$  method. Graphs were  
144 generated using Prism version 6.0 (Graphpad software Inc.).

145 Expression of *vegfaa*, *shha*, and *ptch1* was analyzed by whole-mount in situ  
146 hybridization (WISH) as previously described<sup>35</sup>. Vehicle or E2-treated embryos were  
147 collected at 30 hpf and fixed overnight in fish fixative containing 4%  
148 paraformaldehyde, 22.6 mM NaH<sub>2</sub>PO<sub>4</sub>, 77 mM Na<sub>2</sub>HPO<sub>4</sub>, 1.2 mM CaCl<sub>2</sub>, 40%  
149 Sucrose (all chemicals were purchased from Sigma-Aldrich). Digoxigenin (DIG)-  
150 labeled cRNA probes were synthesized using a DIG RNA labeling Kit (Roche, Berlin,  
151 Germany). Primers are listed in Suppl. Table 1. Brightfield images were acquired  
152 with a SMZ25 stereomicroscope (Nikon).

#### 153 **4. Assessment of vascular defects**

154 Vascular defects were evaluated in control and treated *Tg(kdrl:EGFP)* or  
155 *TgBAC(etv2:EGFP)* embryos under a fluorescent stereo microscope (Zeiss) at 48 hpf  
156 (days post-fertilization). The number of missing or disconnected intersegmental  
157 vessels (ISVs) on each side of the 9 somites anterior to the cloaca was quantified  
158 (i.e. 20 ISVs). The length of the lumenized DA reflects the number of somites with a  
159 lumenized DA. Data were obtained from at least 5 embryos from 3 biological  
160 replicates. Graphs were generated using Prism.

#### 161 **5. Imaging**

162 *LIFEACTION-GFP* or *LIFEACTION-GFP; NLS-mCherry* embryos were used for time-lapse  
163 confocal imaging of the DA, ISVs and the common cardinal vein (CCV). Embryos  
164 were mounted in a glass-bottom petri dish (MatTek), using 0.6% low melting agarose  
165 containing 0.08 mg/mL tricaine (MS-222, Sigma-Aldrich), and 8 μM E2 or vehicle.  
166 The petri dish was filled with egg water containing 0.04 mg/mL tricaine and 8 μM E2  
167 or vehicle. Time-lapse imaging was performed under controlled heating conditions  
168 adjusted at 28.5 C. Images of the forming ISVs and the most posterior region of the  
169 DA were acquired every 20 min using a LD C-apochromat 40X/1.1 W objective lense  
170 in a LSM 800 inverted (Axio Observer) confocal laser scanning microscope (Zeiss).  
171 Images of the forming CCV were acquired every 15 min using the same settings in a



172 LSM 800 inverted confocal microscope or a Spinning disk inverted CSU-X1  
173 microscope (Zeiss).  
174 *Tg(kdrl:EGFP)* embryos were used for confocal imaging of the vascular defects.  
175 Embryos were collected at 48 hpf and fixed overnight in fish fixative. Fixed embryos  
176 were mounted in 1% low melting agarose. Z-stack confocal images were acquired  
177 using a LSM 800 inverted confocal microscope as described above. Brightfield  
178 images of anaesthetized 48 hpf embryos were acquired with a SMZ 25  
179 stereomicroscope (Nikon).

## 180 **6. Surface rendering**

181 Confocal images of *LIFEACT-GFP; NLS-mCherry* embryos were used for surface  
182 rendering of LIFEACT-GFP and nuclear mCherry expression using automatic surface  
183 detection in Imaris x64 version 8.4.1 (Bitplane AG). Cortical endothelial LIFEACT-  
184 GFP expression was used for manual surface rendering of individual using Imaris.

## 185 **7. Migration analyses**

186 Time-lapse images of the forming CCV in *LIFEACT-GFP; NLS-mCherry* embryos  
187 were used for migration analyses. EC mCherry+ were manually selected using spot  
188 detector, and tracked over time using spot tracker in Imaris. At least 7 ECs were  
189 tracked for each sample from 3 biological replicates. Data on migration track length,  
190 migration track displacement length and migration persistence (migration track  
191 length/migration length) were obtained using Imaris track analyses, and plotted using  
192 Prism.

## 193 **8. Generation of nuclear estrogen receptor mutants**

194 Mutant *esr1*<sup>*bns229*</sup>, *esr2a*<sup>*bns228*</sup> and *esr2b*<sup>*bns230*</sup> alleles were generated using the  
195 CRISPR/Cas9 system. The *esr1*<sup>*bns229*</sup> allele contains a 7 bp deletion  
196 (c.477delGCAGCCG; p.A160Wfs\*97) resulting in a predicted truncated polypeptide  
197 containing 160 aa. The *esr2a*<sup>*bns228*</sup> allele carries a 4 bp deletion (c.427delCAGA;

198 p.T143Rfs\*6) and encodes for a predicted polypeptide containing 143 aa. The  
199 *esr2b*<sup>bns230</sup> allele carries a 1 bp deletion and an insertion of 9 bp (c.441del1ins9;  
200 p.D147Gfs\*6), which encodes for a predicted polypeptide containing 147 aa of the N-  
201 terminus of the wild-type protein. Small guide RNAs (sgRNA) were designed against  
202 exon 3 of each gene, which contains the DNA binding domain. Single stranded  
203 oligos containing the sense and antisense sequence of the sgRNA (Supplemental  
204 Table 1) were annealed and cloned into the linearized pT7-gRNA vector. Cloned  
205 sgRNA vectors were linearized with BamHI and used to synthesize the sgRNA with  
206 the MEGAshortscript T7 kit (Ambion, Kaufungen, Germany). The Cas9 vector  
207 (pT3TS-nlsCas9nls, Addgene) was linearized with XbaI and Cas9 mRNA was  
208 synthesized using the mMACHINE T3 transcription kit (Ambion).  
209 Synthesized RNA was purified using the RNA Clean & Concentrator-5 kit (Zymo  
210 Research, Freiburg, Germany). One nL of an injection solution containing 6.5 ng/μL  
211 sgRNA and 150 ng/μL Cas9 mRNA was injected into 1-cell stage embryos.

## 212 9. Genotyping of mutant alleles.

213 *kdr1*<sup>hu5088</sup>, *esr1*<sup>bns229</sup>, *esr2a*<sup>bns228</sup> and *esr2b*<sup>bns230</sup> animals were genotyped by high-  
214 resolution melting curve analyses using DyNAmo ColorFlash SYBR Green (Thermo  
215 Fisher Scientific) and specific primers (Supplemental Table 1) in an Eco Real-Time  
216 PCR system (Illumina). Genotypes were analyzed on normalized derivative plots.  
217 *flt1*<sup>bns29</sup> embryos were genotyped as previously described<sup>33</sup>.

## 218 10. Mosaic endothelial overexpression of estrogen receptors

219 The coding sequence of *esr1*, *esr2a*, *esr2b*, or *gper1* was cloned downstream the  
220 P2A signal in a *fli1ep:membrane-tdTomato-P2A* using the ClaI restriction site in a  
221 pT2 backbone containing tol2 transposon terminal sequences. A constitutively active  
222 *esr1* mutant carrying the p.Y549S missense mutation was generated by site-directed  
223 mutagenesis using primers listed on Supplemental Table 1.

224 One-cell stage *Tg(kdrl:EGFP)* or *Tg(ERE:GFP)* embryos were injected with 30 pg of  
225 the generated constructs and 25 pg *tol2* mRNA. Live embryos showing membrane  
226 tdTomato (mTomato) expression were imaged using LSM 800 inverted confocal  
227 laser scanning microscope at 24 hpf as described above.

## 228 **11. Statistical analyses**

229 Data following a normal distribution were analyzed using a t-test or a one-way  
230 analysis of variance (ANOVA) with Tukey correction for multiple comparisons. Data  
231 not showing a Gaussian distribution were compared using the non-parametric Mann-  
232 Whitney test or a Kruskal-Wallis test with Dunn's correction for multiple comparisons.  
233 Statistical analyses were performed using Prism.

234

## 235 RESULTS

### 236 Excess estrogens impact angiogenesis and vasculogenesis

237 No overt developmental abnormalities were observed in E2-treated zebrafish  
238 embryos at 48 hpf (Figure 1A-A'). However, analysis of *Tg(kdrl:EGFP)* embryos  
239 revealed that excess estrogens induced vascular defects including missing or  
240 disconnected ISVs, ectopic sprouting from the dorsal longitudinal anastomotic vessel  
241 (DLAV), and ISV stenoses (Figure 1B'). The ISV defects were dose-dependent.  
242 Non-linear regression analyses (R square 0.8860) calculated an EC50 of 4  $\mu$ M, with  
243 the induced phenotypes being significantly different from controls starting at 1  $\mu$ M  
244 (Figure 1C).

245 We next performed time-lapse confocal imaging during ISV formation in the posterior  
246 region of the trunk of *LIFEACT-GFP;NLS-mCherry* embryos, reporting for endothelial  
247 filamentous actin (F-actin) and nuclei, respectively, between 29-44 hpf. In control  
248 embryos, ECs in the forming ISVs migrated dorsally from the DA to then anastomose  
249 and form the DLAV. By 35 hpf, this process was completed and ISV lumen formation  
250 and cardinal vein (CV) sprouting were also observed (Figure 1D and Movie 1A).

251 Similarly to controls, tip ECs in E2-treated embryos projected actin rich filopodia  
252 during dorsal migration and anastomosed to form the DLAV. However, dorsal EC  
253 migration in E2-treated embryos was delayed and stalling at the midline was  
254 observed in some ISVs (Figure 1D' and Movies 1B-C). Although hampered, these  
255 projections eventually connected to ECs in the DLAV (Movie 1B). Strikingly, strong  
256 narrowing of the forming ISVs was observed from 38 hpf, coinciding with lumen  
257 formation. These stenoses resolved with loss of cell-cell contacts and ISVs  
258 disconnecting from the DLAV or DA (Figure 1D' and Movies 1B-C).

259 In addition to the ISV defects, 48 hpf E2-treated embryos had a shorter circulatory  
260 loop due to a premature truncation of the lumenized DA (Figure 2A-A'). At 24 hpf,  
261 when treatments were initiated, arterial-venous segregation and extension of the

262 circulatory loop are not yet completed. Time-lapse imaging in control *LIFEACT-GFP*  
263 embryos showed active expansion of the DA lumen between 28-43 hpf (Movie 2A).  
264 Transient stenoses and cell shape changes were observed within regions of lumen  
265 expansion (Figure 2C and Movie 2A). In E2-treated embryos, however, expansion of  
266 the lumenized DA was stalled. Stenoses were also observed at presumptive lumen  
267 extension regions. In contrast to controls, stenoses did not resolve in E2-treated  
268 embryos. Strong cortical F-actin expression was observed in ECs. Furthermore,  
269 cells at the most posterior end of the DA became elongated and migrated posteriorly  
270 and ventrally to exit the lumenized DA. Actively migrating ECs lost anterior  
271 connections with neighboring ECs, resulting in a premature truncation of the  
272 lumenized DA and, hence, the circulatory loop (Figure 2C' and Movie 2B). The DA  
273 phenotype was also dose-dependent (Figure 2B). E2-induced the DA phenotype  
274 starting at 2  $\mu$ M, and non-linear regression analyses (R square 0.9216) calculated an  
275 EC50 of 5  $\mu$ M.

276 Treatments with A4 and T, two E2 precursors, (Supplemental Figure 1A) also  
277 induced ISV disconnections and a premature truncation of the lumenized DA by 48  
278 hpf (Supplemental Figure 1B-B'). Co-incubation with letrozole, an aromatase  
279 inhibitor blocking their conversion into E2, partially rescued the ISV and DA defects  
280 in A4. T induced milder ISV defects and a partly penetrant DA phenotype (5/39  
281 embryos). Although not statistically significant, letrozole also improved the vascular  
282 defects in T-treated embryos (Supplemental Figure 1B-B'). A4 and T can also be  
283 metabolized into 11-KT and DHT, two potent androgens (Supplemental Figure 1A).  
284 Treatments with 11KT and DHT had no effects on vascular morphogenesis  
285 (Supplemental Figure 1C-C'). Altogether, these findings indicate that the described  
286 vascular malformations are estrogen-specific.

287 **Excess estrogens negatively regulate the Hh/Vegf/Notch signaling pathways**  
288 **during vascular development**

289 The E2-induced ISV phenotype was indicative of angiogenic defects. Therefore, we  
290 first assessed the expression of Vegf ligand and receptor genes, master regulators of  
291 developmental angiogenesis. qPCR analyses performed at 30 hpf, just before the  
292 onset of the vascular defects, revealed a 48% reduction in *vegfaa* expression  
293 compared to controls (Figure 3A). Reduced *vegfaa* expression in the posterior  
294 somites of E2-treated embryos was observed by WISH (Figure 3A'). No changes in  
295 the expression of other Vegf ligand genes were observed. Similarly, expression of  
296 *kdrl/vegfr2*, *flt4/vegfr3*, and the decoy *vegfaa* receptor<sup>1</sup>, *flt1/vegfr1*, appeared  
297 unchanged (Figure 3A).

298 We next treated with E2 *Tg(hsp70l:vegfaa<sub>165</sub>)* embryos heat shocked at 22 and 26  
299 hpf (Figure 3B). *vegfaa<sub>165</sub>* overexpression significantly reduced the number of  
300 disconnected or missing ISVs, compared to controls (9 vs 11; median) (Figure 3C-  
301 C'); and improved, albeit not in a statistically significant way, the DA phenotype (24  
302 vs 23; median). Similarly to what was observed in the *vegfaa* overexpression  
303 studies, upon E2 treatment *flt1<sup>-/-</sup>* and *flt1<sup>+/-</sup>* embryos exhibited a significantly lower  
304 number of ISV defects than wild-type siblings (3 vs 3 vs 9; median) (Figure 3D-D').  
305 Also, *flt1<sup>-/-</sup>* and *flt1<sup>+/-</sup>* embryos exhibited a longer lumenized DA, compared to wild-  
306 type siblings (24 vs 24 vs 22; median) (Figure 3D-D'). These results indicate that  
307 reduced *vegfaa* expression plays a role in the etiology of the E2-induced vascular  
308 defects.

309 Hh signaling induces *Vegfa* expression<sup>1,2</sup>. No significant changes in *shha*, *smo*, and  
310 *gli3* expression were observed by qPCR and WISH at 30 hpf. However, E2 reduced  
311 expression of the Hh regulated genes *gli1* (27%), and *ptch1* (68%), and the latter  
312 nearly became undetectable in the myotome by WISH (Figure 4A-A'). The  
313 expression of *ctrlra*, a downstream target of Hh signaling, was mildly but not  
314 significantly reduced (Figure 4A). Activation of Hh signaling with the Smo agonist  
315 SAG induced a partial rescue of the E2-induced ISV phenotype, compared to DMSO

316 controls (12 vs 14, median), and increased the length of the lumenized DA (23 vs 22,  
317 median) (Figure 4C-C'). These results indicate that excess estrogen signaling is a  
318 negative regulator of Hh signaling.

319 VEGFA-dependent activation of Notch signaling is required for arterial-venous  
320 segregation. *vegfaa*<sup>+/-</sup> embryos exhibit a mild and lowly penetrant arterial-venous  
321 malformation phenotype (6/40 embryos) (Supplemental Figure 2A). Treatments of  
322 *vegfaa*<sup>+/-</sup> embryos with 1  $\mu$ M E2, an E2 dose with no effects on the expansion of the  
323 circulatory loop, led to a significant shortening of the lumenized DA when compared  
324 to untreated *vegfaa*<sup>+/-</sup> embryos or E2-treated wild-type siblings (29 vs 31 vs 31,  
325 respectively; median) (Supplemental Figure 2A-A'). Reduced expression of the  
326 Notch ligand gene *dll4* (28%) was observed in E2-treated embryos by qPCR at 30  
327 hpf. Expression of *notch1b* and *notch3*, and the Notch-regulated arterial marker  
328 genes *efnb2a* or *hey2* appeared unaffected (Supplemental Figure 2B). Similarly to  
329 what was observed in *vegfaa*<sup>+/-</sup> embryos, injection of a low dose of a splice *dll4* MO<sup>36</sup>  
330 (1.5 ng) led to a mild and partly penetrant shortening of the circulatory loop (20/50  
331 embryos). E2 treatment (4  $\mu$ M) significantly worsened the DA phenotype in *dll4*  
332 morphants, compared to untreated *dll4* MO or uninjected E2-treated embryos (19 vs  
333 30 vs 24; median) (Supplemental Figure 2C-C'). *dll4* morphants also exhibited  
334 ectopic sprouting in the dorsal side of the intersomitic space by 48 hpf. E2 treatment  
335 did not affect the *dll4* MO-dependent ectopic sprouting. Furthermore, injection of the  
336 *dll4* MO had no effects on the ISV defects induced by excess estrogens  
337 (Supplemental Figure 2D-D'). Altogether, these data indicate that excess estrogens  
338 impair vascular development due to a negative regulation of the Hh/Vegf/Dll4 axis,  
339 with significant downregulation of *ptch1*, *vegfaa*, and *dll4* expression following E2  
340 treatment.

341 **Excess estrogens promote EC migration independently of Vegfaa by**  
342 **modulating PI3K and Rho GTPase signaling**

343 A reduced number of disconnected/missing ISVs and a longer lumenized DA were  
344 observed in E2-treated *kdr1<sup>-/-</sup>* embryos, compared to wild-type siblings (ISVs, 5 vs 9;  
345 DA, 24 vs 23; median) (Supplemental Figure 3), suggesting that E2 exposure might  
346 affect vascular development in a *Vegfaa/Kdr1*-independent manner.

347 To investigate potential *Vegfaa*-independent effects of excess estrogens during  
348 vascular development, we examined how E2 treatment impact CCV formation. The  
349 CCV forms from the cardinal vein (CV) and extends around each side of the yolk to  
350 converge cranioventrally at the sinus venosus of the heart. This process relies on  
351 EC proliferation and collective cell migration, which are dependent on *Vegfc* and  
352 Cadherin 5 (*Cdh5*) signaling respectively<sup>27</sup>. Time-lapse imaging in *LIFEACT-*  
353 *GFP;NLS-mCherry* embryos revealed an increased length of the CCV in E2-treated  
354 embryos (Figure 5C-C'). Migration analyses of individual EC nuclei in the forming  
355 CCV between 32-36 hpf revealed a 30% increased EC migration track length in E2-  
356 treated embryos. A milder increase (12%) on EC track displacement length was also  
357 observed in E2-treated embryos, indicative of reduced directional migration  
358 (migration persistence) (Figure 5E). Increased migration track length was more  
359 prominent in follower ECs (data not shown), whilst reduced directionality was more  
360 common in leader ECs (Movies 3A-B). These findings show that excess estrogens  
361 can promote aberrant EC migration in a *Vegfaa*-independent context.

362 We next asked whether increased EC migration was contributing to the E2-induced  
363 vascular defects. First, we co-treated zebrafish embryos with E2 and the broad  
364 range PI3K inhibitor LY294002. The concentration of LY294002 used (1  $\mu$ M) did not  
365 induce any vascular or morphological abnormalities (Figure 6A'). PI3K inhibition  
366 partially rescued the vascular defects induced by excess estrogens compared to  
367 DMSO controls (ISV, 12 vs 14; DA, 23 vs 22; median) (Figure 6A-A'). Similarly,  
368 inhibition of FAK, Rac1 and Rho induced a 40-50% reduction in E2-induced ISV  
369 defects. Although not statistically significant, fewer ISV defects were also observed



370 upon Cdc42 inhibition (7 vs 8; median) (Figure 6B). Rac1, Cdc42 and Rho inhibition  
371 significantly increased the length of the DA in E2-treated embryos, compared to  
372 vehicle controls (24 vs 23, 25 vs 24, and 24 vs 23, respectively; median). FAK  
373 inhibition had no effects on the DA phenotype (Figure 6B'). These results indicate  
374 that increased PI3K and Rho GTPase signaling contributes to the E2-induced  
375 vascular defects.

### 376 **Signaling from Esr1 and Gper1 mediate the vascular defects induced by** 377 **excess estrogens**

378 Treatments with the pan-ER inhibitor ICI dramatically reduced the E2-induced ISV  
379 defects (2 vs 8; median) and increased the length of the lumenized DA (24 vs 22;  
380 median) (Figure 7A-B'). In zebrafish, the nuclear estrogen receptor  $\alpha$  is encoded by  
381 *esr1*, whilst the nuclear estrogen receptor  $\beta$  is encoded by the paralog genes *esr2a*  
382 and *esr2b*. We generated mutant alleles for the three zebrafish nuclear receptor  
383 genes using the CRISPR/Cas9 system. The recovered *esr1*<sup>bns229</sup>, *esr2a*<sup>bns230</sup> and  
384 *esr2b*<sup>bns228</sup> alleles are predicted to encode proteins that lack the DNA binding, hinge,  
385 and ligand-binding domains and thus to be non-functional polypeptide (Supplemental  
386 Figure 4). *esr1*, *esr2a* and *esr2b* mutants have no overt morphological or vascular  
387 defects. E2 treatment in *esr1* mutants revealed a modest albeit significant rescue of  
388 the ISV and DA defects compared to wild-type siblings (ISV, 14 vs 16 and DA, 23 vs  
389 22, respectively; median) (Figure 7C). *esr2a* and *esr2b* mutations had no significant  
390 effects on the E2-induced vascular defects induced by E2 (Figure 7C'-C'').

391 In addition to the Esr receptors, estrogens also signal via Gper1. Selective Gper1  
392 inhibition with G36 also induced a pronounced reduction of the ISV defects induced  
393 by E2 (4 vs 11.5; median) and increased the length of the circulatory loop (23 vs 22;  
394 median) (Figure 7D-D'). G1, a selective Gper1 agonist, also induced ISV  
395 disconnections that mimicked those induced by E2 (Supplemental Figure 5A). In  
396 addition, G1 treatments led to morphological defects in the most posterior region of

397 the trunk vasculature. However, these defects did not recapitulate the DA defects  
398 induced by E2 (Supplemental Figure 5A). G1-induced vascular defects were fully  
399 rescued by G36 (Supplemental Figure 5A-A'). Hence, *Esr1* and *Gper1* are the main  
400 effectors of excess estrogens, although cooperative interactions with *Esr2a* and/or  
401 *Esr2b* might also contribute to the E2-induced vascular defects.

#### 402 **Endothelial *gper1* signaling promotes migration and cell-cell disconnections**

403 To ascertain whether the effects on EC migration and cell-cell contacts were due to a  
404 direct endothelial response to excess estrogens, we generated endothelial mosaic  
405 overexpression of the estrogen receptors. To enable the visualization of ECs  
406 overexpressing the estrogen receptors, constructs also contained *mTomato*. Control  
407 animals, injected with the construct *fli1ep:mTomato-P2A-EGFP*, exhibited no  
408 significant vascular defects at 24 hpf (Figure 8A-A'). Endothelial *mTomato*<sup>+</sup> clusters  
409 were observed on the dorsal side of 24 hpf embryos injected with *fli1ep:mTomato-*  
410 *P2A-gper1* (6/8 embryos), and were disconnected from the forming ISVs (Figure 8B-  
411 B').

412 We generated an *esr1* mutant (p.Y549S), recreating a mutation within the ligand-  
413 binding domain previously shown to confer constitutive activity (CA)<sup>37</sup>. Injection of  
414 *fli1ep:mTomato-P2A-esr1-CA* in 1-cell stage *Tg(ERE:GFP)* embryos induced *GFP*  
415 expression in *mTomato*<sup>+</sup> ECs (Supplemental Figure 6), confirming that this *Esr1*  
416 mutant is also constitutively active in zebrafish. However, mosaic endothelial *esr1-*  
417 *CA* overexpression had no effect on angiogenesis by 24 hpf (Figure 8C-C').  
418 Similarly, mosaic endothelial overexpression of wild-type *esr1*, *esr2a*, or *esr2b* had  
419 no impact on vascular morphogenesis at 24 hpf (Figure 8D-F').

420 Altogether, these results indicate that *Gper1* can act cell-autonomously to promote  
421 EC migration and cell-cell disconnections. Furthermore, it suggests that *Esr1* acts  
422 most prominently in a paracrine fashion, possibly by negatively regulating  
423 Hh/Vegf/Notch signaling.

## 424 DISCUSSION

425 In extra-ovarian tissues, estrogens are synthesized from circulating androgens and  
426 sulfated estrogens by the aromatase enzyme or the sulfatase (STS) and 17 $\beta$ -  
427 hydroxysteroid dehydrogenase type 1 (HSD17B1) enzymes, respectively. Increased  
428 expression of these enzymes leads to estrogen excess<sup>38,39</sup>. In addition to genetic  
429 sources of estrogen excess, endocrine disruptors with estrogenic activity have been  
430 described<sup>24</sup>. In contrast to beneficial proangiogenic effects of physiologic estrogens,  
431 epidemiologic and *in vivo* studies suggest that excess estrogens may induce  
432 vascular defects<sup>21-23</sup>. Yet, how excess estrogen signaling impacts vascular  
433 morphogenesis remains elusive. We found that excess estrogens during early  
434 zebrafish development lead to vascular malformations due to decreased  
435 Hh/Vegfaa/Notch signaling, and increased PI3K and Rho GTPases activity. Esr1  
436 and Gper1 are the main effectors of excess estrogens. Gper1 can cell-autonomously  
437 promote endothelial migration and cell-cell disconnections, whilst Esr1 acts in a cell  
438 non-autonomous fashion on endothelial cell behavior.

439 ESR1 promotes *VEGFA* expression upon binding to EREs within the proximal  
440 promoter region. Increased *Vegfa* expression induced by physiologic E2  
441 concentrations promotes capillary formation *in vivo* and *in vitro*<sup>7-9</sup>. In contrast to  
442 physiologic conditions, we show that excess estrogens impair *vegfaa* expression by  
443 negatively regulating Hh signaling. E2-dependent *Vegfaa* downregulation has been  
444 reported at earlier stages of vascular development, however, in contrast to our study,  
445 the authors concluded it was Hh signaling independent<sup>51</sup>. Differences on tissue and  
446 developmental stage-specific estrogenic responses along with dose-dependent  
447 responses to E2 might explain the differences between our findings and previous  
448 studies. Opposing effects of estrogen signaling on Hh pathway activation have been  
449 reported in breast and gastric cancer<sup>40-42</sup>, whilst neonatal estrogen exposure  
450 negatively regulates Hh signaling in the prostate<sup>43</sup>. Our data confirms excess

451 estrogen signaling as a negative regulator of Hh signaling during development, and  
452 together with previous studies, it suggests that the effects of estrogens on Hh  
453 signaling might be context and dose-dependent.

454 Expression of the Notch ligand gene *dll4* was also reduced in E2-treated embryos.  
455 Loss of the Notch effector genes *hey2* and *efnb2a* results in arterial-venous shunts  
456 due to increased PI3K-dependent ventral sprouting from the DA primordium<sup>5,6,44</sup>.  
457 Excess estrogens did not affect *hey2* and *efnb2a* expression by 30 hpf, shortly  
458 before the onset of the DA phenotype. However, E2 treatment exacerbated the DA  
459 phenotype in *dll4* morphants, suggesting that Notch signaling is downregulated by  
460 excess estrogens. Furthermore, PI3K inhibition partially rescued the axial vessel  
461 segregation defects. These findings indicate that excess estrogens impair Notch-  
462 dependent arterial-venous segregation. However, reduced *dll4* expression did not  
463 appear to have a role in the etiology of the E2-induced ISV phenotype. During  
464 angiogenesis, DLL4 activates Notch signaling in receiver cells, which blocks EC  
465 response to VEGFA and hence prevents hypersprouting and branching<sup>1</sup>. E2-  
466 treatments did not recapitulate the hyperbranching phenotype induced by deficient  
467 Notch signaling. Furthermore, injections of a *dll4* MO had no effects on the E2-  
468 induced ISV phenotype. These results are most likely explained by the reduced  
469 *vegfaa* levels in E2-treated embryos.

470 In addition, our study shows that *kdrl* haploinsufficiency protects against the E2-  
471 induced vascular phenotypes. Furthermore, we show that E2 treatment promote EC  
472 migration during CCV formation, a *Vegfaa*-independent process. Activation of  
473 PI3K/AKT signaling, downstream of integrins and receptor tyrosine kinases, initiates  
474 intracellular responses leading to the activation of small Rho GTPases. Polarized  
475 activation of Cdc42, Rac1 and RhoA is required for directional cell migration<sup>3,4</sup>. In  
476 agreement with previous studies<sup>14,17,45-48</sup>, our pharmacological data shows excess  
477 estrogen signaling promotes an increased activation of PI3K and Rho GTPase

478 signaling. Importantly, it also indicates that hyperactivation of these pathways  
479 induces cell-cell disconnections within the intersegmental and axial vessels. In  
480 addition to cell migration, Rho GTPases also participate in lumen formation.  
481 Overexpression of constitutively active and dominant negative Cdc42 and Rac1  
482 disrupts lumen formation *in vitro*<sup>49</sup>. Interestingly, the onset of the E2-induced cell-cell  
483 disconnections coincides with lumen formation. Our data suggest that excess  
484 estrogens, by promoting Rho GTPases activity, may not only affect EC migration but  
485 also the maturation of cell-cell contacts and lumen expansion.

486 Extensive research on ESR1 and ESR2 genomic signaling indicate that these  
487 receptors have unique, overlapping and opposing actions in a ligand, cellular and  
488 genomic context dependent fashion<sup>50</sup>. Our study shows that excess estrogens  
489 predominantly signal via Esr1 and Gper1, albeit a cooperative synergism with Esr2a  
490 and Esr2b may contribute to the etiology of the vascular defects. In addition to  
491 promoting *Vegfa* expression, ESR1 and GPER1 signaling from the plasma  
492 membrane promotes EC migration via activation of PI3K/AKT signaling and  
493 downstream effectors in the endothelium<sup>14,17,45-48</sup>. We show that endothelial Gper1  
494 overexpression is sufficient to induce cell-cell disconnections and excessive  
495 migration, demonstrating for the first time a cell-autonomous role for Gper1 signaling  
496 in the etiology of vascular malformations. Mosaic endothelial overexpression of wild-  
497 type or CA<sup>37</sup> nuclear estrogen receptors had no effects on EC sprouting or migration  
498 during developmental angiogenesis. These results strongly indicate that nuclear  
499 estrogen receptor signaling is the main driver of the non-endothelial response to  
500 excess estrogens leading to vascular defects.

501 In summary, we established a new zebrafish model for studies into dysregulated  
502 estrogen signaling during development. Using this model, we uncovered complex  
503 endothelial and extra-endothelial responses contributing to the vascular defects due  
504 to developmental estrogen excess. Importantly, our study brings new insights into

505 the role of dysregulated estrogen signaling on the developmental programming of  
506 vascular disease. Furthermore, the identified estrogen-modulated pathways play key  
507 roles during the revascularization of ischemic tissues as well as tumor  
508 vascularization and invasiveness. Future studies using specific disease models will  
509 provide a more comprehensive understanding of how excess estrogens modulate  
510 pathologic angiogenesis, and may help to identify new therapeutic targets for  
511 improved personalized medicine.

512

### 513 **ACKNOWLEDGEMENTS**

514 We thank Michele Marass and Andrea Rossi for sharing *flt1*, *mflt1* and *vegfaa*  
515 mutants, Radhan Ramadass and Jenny Pestel for help with imaging and image  
516 analyses, Rubén Marín-Juez, Michelle Collins and Sébastien Gouvrit for comments  
517 on the manuscript, and other members of the Stainier lab for sharing reagents and  
518 discussions. This work was supported by a postdoctoral fellowship from the  
519 European Society for Endocrinology to SP and funds from the Max Planck Society to  
520 DYRS.

521

522 **REFERENCES**

- 523 1. Herbert S, Stainier D. Molecular control of endothelial cell behaviour during  
524 blood vessel morphogenesis. *Nat Rev Mol Cell Biol.* 2011;12:551–564.
- 525 2. Adams RH, Alitalo K. Molecular regulation of angiogenesis and  
526 lymphangiogenesis. *Nat Rev Mol Cell Biol.* 2007;8:464–78.
- 527 3. Mayor R, Etienne-Manneville S. The front and rear of collective cell  
528 migration. *Nat Rev Mol Cell Biol.* 2016;17:97–109.
- 529 4. Lamalice L, Boeuf F, Huot J. Endothelial cell migration during angiogenesis.  
530 *Circ Res.* 2007;100:782–794.
- 531 5. Fish JE, Wythe JD. The molecular regulation of arteriovenous specification  
532 and maintenance. *Dev Dyn.* 2015;244:391–409.
- 533 6. Herbert SP, Huisken J, Kim TN, Feldman ME, Houseman BT, Wang RA,  
534 Shokat KM, Stainier DY. Arterial-venous segregation by selective cell sprouting: an  
535 alternative mode of blood vessel formation. *Science.* 2009;326:294–8.
- 536 7. Losordo DW, Isner JM. Estrogen and angiogenesis: A review. *Arterioscler*  
537 *Thromb Vasc Biol.* 2001;21:6–12.
- 538 8. Baruscotti I, Barchiesi F, Jackson E, Imthurn B, Stiller R, Kim J-H,  
539 Schaufelberger S, Rosselli M, Hughes C, Dubey R. Estradiol Stimulates Capillary  
540 Formation by Human Endothelial Progenitor Cells. *Hypertension.* 2010;56:397–404.
- 541 9. Morales D, McGowan K, Grant D, Maheshwari S, Bhartiya D, Cid M,  
542 Kleinman H, Schnaper H. Estrogen Promotes Angiogenic Activity in Human  
543 Umbilical Vein Endothelial Cells In Vitro and in a Murine Model. *Circulation.*  
544 1995;91:755–763.
- 545 10. Marino M, Galluzzo P, Ascenzi P. Estrogen Signaling Multiple Pathways to  
546 Impact Gene Transcription. *Curr Genom.* 2006;7:497–508.

- 547 11. Elkin M, Orgel A, Kleinman HK. An angiogenic switch in breast cancer  
548 involves estrogen and soluble vascular endothelial growth factor receptor 1. *N Natl*  
549 *Cancer Inst.* 2004;96:875–878.
- 550 12. Iwakura A, Shastry S, Luedemann C, Hamada H. Estradiol Enhances  
551 Recovery After Myocardial Infarction by Augmenting Incorporation of Bone  
552 Marrow-Derived Endothelial Progenitor Cells Into Sites of Ischemia-Induced  
553 Neovascularization via Endothelial Nitric Oxide Synthase-Mediated Activation of  
554 Matrix Metalloproteinase-9. *Circulation.* 2006;113:1605–1614.
- 555 13. Simoncini T, Scorticati C, Mannella P, Fadiel A, Giretti M, Fu X-D, Baldacci  
556 C, Garibaldi S, Caruso A, Fornari L, Naftolin F, Genazzani A. Estrogen Receptor  $\alpha$   
557 Interacts with G $\alpha$ 13 to Drive Actin Remodeling and Endothelial Cell Migration via the  
558 RhoA/Rho Kinase/Moesin Pathway. *Mol Endocrinol.* 2006;20:1756–1771.
- 559 14. Razandi M, Pedram A, Levin E. Estrogen Signals to the Preservation of  
560 Endothelial Cell Form and Function. *J Biol Chem.* 2000;275:38540–38546.
- 561 15. Oviedo P, Sobrino A, Laguna-Fernandez A, Novella S, Tarín J, García-Pérez  
562 M-A, Sanchís J, Cano A, Hermenegildo C. Estradiol induces endothelial cell  
563 migration and proliferation through estrogen receptor-enhanced RhoA/ROCK  
564 pathway. *Mol Cell Endocrinol.* 2011;335:96–103.
- 565 16. Regitz-Zagrosek V. Therapeutic implications of the gender-specific aspects of  
566 cardiovascular disease. *Nat Rev Drug Discov.* 2006;5:425–239.
- 567 17. Miller VM, Duckles SP. Vascular actions of estrogens: functional  
568 implications. *Pharmacol Rev.* 2008;60:210–41.
- 569 18. Murphy E. Estrogen Signaling and Cardiovascular Disease. *Circ Res.*  
570 2011;109:687–696.
- 571 19. White RE. Estrogen and vascular function. *Vascul Pharmacol.* 2002;38:73–



- 572 80.
- 573 20. Mendelsohn M. Mechanisms of estrogen action in the cardiovascular system.  
574 *J Steroid Biochem Mol Biol.* 2000;74:337343.
- 575 21. Li CP, Lee FY, Hwang SJ, Chang FY, Lin HC, Lu RH, Hou MC, Chu CJ,  
576 Chan CC, Luo JC, Lee SD. Spider angiomas in patients with liver cirrhosis: role of  
577 alcoholism and impaired liver function. *Scand J Gastroenterol.* 1999;34:520–3.
- 578 22. Mahendroo MS, Cala KM, Landrum DP, Russell DW. Fetal death in mice  
579 lacking 5alpha-reductase type 1 caused by estrogen excess. *Mol Endocrinol.*  
580 1997;11:917–27.
- 581 23. Tong M, Jiang H, Liu P, Lawson J, Brass L, Song W-C. Spontaneous fetal  
582 loss caused by placental thrombosis in estrogen sulfotransferase—deficient mice. *Nat*  
583 *Med.* 2005;11:153–159.
- 584 24. Yang O, Kim HL, Weon J-II, Seo YR. Endocrine-disrupting Chemicals:  
585 Review of Toxicological Mechanisms Using Molecular Pathway Analysis. *J Cancer*  
586 *Prev.* 2015;20:12–24.
- 587 25. Wang, Kaiser, Larson, Nasevicius, Clark, Wadman, Roberg-Perez, Ekker,  
588 Hackett, McGrail, Essner. Moesin1 and Ve-cadherin are required in endothelial cells  
589 during in vivo tubulogenesis. *Development.* 2010;137:3119–3128.
- 590 26. Bussmann, Wolfe, Siekmann. Arterial-venous network formation during brain  
591 vascularization involves hemodynamic regulation of chemokine signaling.  
592 *Development.* 2011;138:1717–1726.
- 593 27. Helker CS, Schuermann A, Karpanen T, Zeuschner D, Belting H-GG, Affolter  
594 M, Schulte-Merker S, Herzog W. The zebrafish common cardinal veins develop by a  
595 novel mechanism: lumen ensheathment. *Development.* 2013;140:2776–86.
- 596 28. Jin S-WW, Beis D, Mitchell T, Chen J-NN, Stainier DY. Cellular and

- 597 molecular analyses of vascular tube and lumen formation in zebrafish. *Development*.  
598 2005;132:5199–209.
- 599 29. Proulx K, Lu A, Sumanas S. Cranial vasculature in zebrafish forms by  
600 angioblast cluster-derived angiogenesis. *Dev Biol*. 2010;348:34–46.
- 601 30. Matsuoka RL, Rossi A, Stone OA, Stainier DYRY. CNS-resident progenitors  
602 direct the vascularization of neighboring tissues. *Proc Natl Acad Sci USA*.  
603 2017;114:10137–10142.
- 604 31. Gorelick D, Halpern M. Visualization of estrogen receptor transcriptional  
605 activation in zebrafish. *Endocrinology*. 2011;152:2690–703.
- 606 32. Bussmann J, Bos F, Urasaki A, Kawakami K, Duckers H, Schulte-Merker S.  
607 Arteries provide essential guidance cues for lymphatic endothelial cells in the  
608 zebrafish trunk. *Development*. 2010;137:2653–2657.
- 609 33. Matsuoka RL, Marass M, Avdesh A, Helker CS, Maischein H-MM, Grosse  
610 AS, Kaur H, Lawson ND, Herzog W, Stainier DY. Radial glia regulate vascular  
611 patterning around the developing spinal cord. *Elife*. 2016;5.
- 612 34. Rossi A, Gauvrit S, Marass M, Pan L, Moens CB, Stainier DY. Regulation of  
613 Vegf signaling by natural and synthetic ligands. *Blood*. 2016;
- 614 35. Thisse C, Thisse B. High-resolution in situ hybridization to whole-mount  
615 zebrafish embryos. *Nat Prot*. 2008;3:59–69.
- 616 36. Hogan B, Herpers R, Witte M, Heloterä H, Alitalo K, Duckers H, Schulte-  
617 Merker S. Vegfc/Flt4 signalling is suppressed by Dll4 in developing zebrafish  
618 intersegmental arteries. *Development*. 2009;136:4001–9.
- 619 37. Jeselsohn R, Yelensky R, Buchwalter G, Frampton G, Meric-Bernstam F,  
620 Gonzalez-Angulo AM, Ferrer-Lozano J, Perez-Fidalgo JA, Cristofanilli M, Gómez H,  
621 Arteaga CL, Giltane J, Balko JM, Cronin MT, Jarosz M, Sun J, Hawryluk M, Lipson

- 622 D, Otto G, Ross JS, Dvir A, Soussan-Gutman L, Wolf I, Rubinek T, Gilmore L,  
623 Schnitt S, Come SE, Pusztai L, Stephens P, Brown M, Miller VA. Emergence of  
624 constitutively active estrogen receptor- $\alpha$  mutations in pretreated advanced estrogen  
625 receptor-positive breast cancer. *Clin Cancer Res.* 2014;20:1757–1767.
- 626 38. Yaghjian L, Colditz G. Estrogens in the breast tissue: a systematic review.  
627 *Cancer Causes Control.* 2011;22:529–540.
- 628 39. Suzuki T, Moriya T, Ishida T, Ohuchi N, Sasano H. Intracrine mechanism of  
629 estrogen synthesis in breast cancer. *Biomed Pharmacother.* 2003;57:460–462.
- 630 40. Ali SA. The hedgehog pathway in breast cancer. *Chin J Cancer Res.*  
631 2012;24:261–2.
- 632 41. Sun Y, Wang Y, Fan C, Gao P, Wang X, Wei G, Wei J. Estrogen promotes  
633 stemness and invasiveness of ER-positive breast cancer cells through Gli1 activation.  
634 *Mol Cancer.* 2014;13:137.
- 635 42. Xu C, Li J, Lu Y, Jiang Z. Estrogen receptor  $\alpha$  and hedgehog signal pathway  
636 developmental biology of gastric adenocarcinoma. *Hepatogastroenterology.*  
637 2012;59:1319–22.
- 638 43. Huang L, Pu Y, Alam S, Birch L, Prins GS. The role of Fgf10 signaling in  
639 branching morphogenesis and gene expression of the rat prostate gland: lobe-specific  
640 suppression by neonatal estrogens. *Dev Biol.* 2005;278:396–414.
- 641 44. Weinstein BM, Stemple DL, Driever W, Fishman MC. Gridlock, a localized  
642 heritable vascular patterning defect in the zebrafish. *Nat Med.* 1995;1:1143–7.
- 643 45. Moriarty K, Kim K, Bender J. Estrogen Receptor-Mediated Rapid Signaling.  
644 *Endocrinology.* 2006;147:5557–5563.
- 645 46. Arnal J-F, Fontaine C, Billon-Galés A, Favre J, Laurell H, Lenfant F, Gourdy  
646 P. Estrogen Receptors and Endothelium. *Arterioscler Thromb Vasc Biol.*

647 2010;30:1506–1512.

648 47. Li S, Dang Y, Zhou X, Huang B, Huang X, Zhang Z, Kwan YW, Chan SW,

649 Leung GP, Lee SM, Hoi MP. Formononetin promotes angiogenesis through the

650 estrogen receptor alpha-enhanced ROCK pathway. *Sci Rep.* 2015;5:16815.

651 48. Trenti A, Tedesco S, Boscaro C, Ferri N, Cignarella A, Trevisi L, Bolego C.

652 The Glycolytic Enzyme PFKFB3 Is Involved in Estrogen-Mediated Angiogenesis via

653 GPER1. *J Pharmacol Exp Ther.* 2017;361:398–407.

654 49. Sigurbjörnsdóttir S, Mathew R, Leptin M. Molecular mechanisms of de novo

655 lumen formation. *Nat Rev Mol Cell Biol.* 2014;15:665–76.

656 50. Zhao C, Dahlman-Wright K, Gustafsson J. Estrogen receptor beta: an

657 overview and update. *Nucl Recept Signal.* 2008;

658

659

660

661

662

663

664

665

666

667

668

669

670

671

672

673 **Figure 1. Excess estrogens during developmental angiogenesis induce EC**  
674 **cell-cell disconnections and ISV defects. (A-A')** Brightfield images of 48 hpf  
675 embryos treated with vehicle (Ctl) or E2. E2 treatment induce no overt morphological  
676 defects (n=10). **(B-B')** Maximum intensity projections of the trunk vasculature  
677 anterior to the cloaca of Ctl (B) or E2-treated (B') embryos at 48 hpf. E2-treated  
678 embryos exhibit stenosed (pink arrowhead) and missing/disconnected (white  
679 arrowheads) intersegmental vessels (ISVs), and ectopic sprouting from the dorsal  
680 longitudinal anastomotic vessel (DLAV, yellow arrowhead). **(C)** E2 dose-response  
681 curve for the ISV phenotype at 48 hpf. X-axis is in logarithmic scale. The E2-  
682 induced ISV defects become significantly different from control embryos at 1  $\mu$ M  
683 (n=20). Mean  $\pm$  SEM are shown. **(D-D')** Time-lapse confocal imaging of forming  
684 ISVs in Ctl (D) and E2-treated (D') embryos between 29-45 hpf. Negative maximum  
685 intensity projections of endothelial actin filaments (LIFEACT-GFP, black) and nuclei  
686 (NLS-mCherry, red) are shown. Control ISVs migrate dorsally, undergo lumen  
687 formation (pink arrow) and anastomose to form the dorsal longitudinal anastomotic  
688 vessel (DLAV) (black arrows). ISVs in E2-treated embryos appear delayed (black  
689 arrowheads), yet extend dorsally and form the DLAV (green arrowheads). During  
690 lumen formation, ISVs show stenoses (pink arrowheads) and disconnect from the  
691 dorsal aorta (DA) (blue arrowhead). \*, p<0.05; \*\*\*, p<0.001; \*\*\*\*, p<0.0001. Scale  
692 bars, 250  $\mu$ m (A-A'); 50  $\mu$ m (B-B') and 25  $\mu$ m (D-D').

693

694

695 **Figure 2. Excess estrogens induce a shortening of the circulatory loop due to**  
696 **impaired axial vessel segregation. (A)** Maximum intensity projections of the  
697 posterior trunk vasculature of vehicle (Ctl) (A) or E2-treated (A') embryos at 48 hpf.  
698 Excess estrogens induce a premature truncation of the lumenized dorsal aorta (DA)  
699 (yellow arrowhead). **(B)** E2 dose-response curve for the DA phenotype at 48 hpf. X-  
700 axis is in logarithmic scale. E2 effects on the DA becomes significantly different at 2

701  $\mu\text{M}$  (n=20). Mean  $\pm$  SEM are shown. **(C-C')** Time-lapse confocal images of the DA  
702 lumen expansion of Ctl (C) and E2-treated (C') embryos. Negative images of  
703 endothelial F-actin (LIFEACT-GFP) are shown. Time is at the top left corner  
704 (hh:mm). The DA is pseudocolored in red and outlined with red dashed lines. DA  
705 stenoses are observed within the lumen expansion region (black arrows) (C-C'). (C)  
706 Rendered in green, control ECs undergoing transient cell shape changes during  
707 lumen expansion. (C') DA stenoses in E2-treated embryos fail to resolve (pink  
708 arrow). Rendered in yellow and blue, two ECs at the stenosed region migrating  
709 posteriorly and detaching from their anterior neighbors; resulting in a premature  
710 truncation of the circulatory loop (blue arrows). Black arrowheads, delayed  
711 intersegmental vessel (ISV) sprouting. \*,  $p < 0.05$ ; \*\*\*\*,  $p < 0.0001$ . Scale bars, 50  $\mu\text{m}$   
712 (A) and 20  $\mu\text{m}$  (C-C'). CVP, cardinal vein plexus.

713

714

715 **Figure 3. Developmental estrogen excess negatively regulates Vegfaa**  
716 **signaling. (A-A')** Expression analyses of *vegfl* ligand and receptor genes in 30 hpf  
717 vehicle (Ctl) and E2-treated embryos using qPCR (A) and whole-mount *in situ*  
718 hybridization (A'). Excess estrogens downregulate somitic *vegfaa* expression (black  
719 arrowheads). Mean $\pm$ SEM are plotted. **(B)** Schematic of the heat shock (hs) protocol  
720 used to rescue *vegfaa* expression in E2-treated embryos. **(C-C')** Maximum intensity  
721 projections (C) and quantification (C') of the E2-induced intersegmental vessel (ISV)  
722 and dorsal aorta (DA) phenotypes in heat shocked (*hsp70l:vegfaa165*) and wild-type  
723 siblings at 48 hpf. *vegfaa*<sub>165</sub> overexpression partially rescues the ISV (white  
724 arrowheads), and, albeit not significant, the DA phenotypes (yellow arrowheads). **(D-**  
725 **D')** Maximum intensity projections (D) and quantification (D') of the E2-induced  
726 vascular defects in *flt1* mutants and wild-type siblings. Increased Vegfaa  
727 bioavailability in *flt1* mutants significantly rescues the E2-induced ISV (white

728 arrowheads) and DA (yellow arrowheads) phenotypes. Top panels in (C, D), trunk  
729 vasculature anterior to the cloaca. Bottom panels in (C, D), axial vessels within  
730 somites 22 and 26. \*,  $p < 0.05$ , \*\*,  $p < 0.01$ , \*\*\*,  $p < 0.001$ ; n.s., not significant. Scale  
731 bars, 200  $\mu\text{m}$  (A') and 50  $\mu\text{m}$  (C, D). *sflt1*, soluble flt1; *mflt1*, membrane flt1; CVP,  
732 cardinal vein plexus; ↓, reduced *vegfaa* expression.

733

734

735 **Figure 4. Excess estrogens impair Hh signaling. (A-B)** Expression analyses of  
736 ligand and receptor genes of the Hh signaling pathway using qPCR (A) and whole-  
737 mount in situ hybridization (B) in 30 hpf control (Ctl) and E2-treated embryos. E2-  
738 treated embryos have reduced *gli1* expression and almost negligible myotome *ptch1*  
739 expression. Mean  $\pm$  SEM are shown. **(C-C')** Maximum intensity projections (C) and  
740 quantification (C') of the effect of the smoothed agonist SAG on E2-induced  
741 vascular defects at 48 hpf. Hh signaling activation partially rescues the  
742 intersegmental vessel (ISV) (white arrowheads) and dorsal aorta (DA, yellow  
743 arrowheads) phenotypes induced by excess estrogens. Top panels in (C), trunk  
744 vasculature anterior to the cloaca. Bottom panels in (C), axial vessels within somites  
745 22 and 26. \*,  $p < 0.05$ , \*\*,  $p < 0.01$ , \*\*\*,  $p < 0.001$ . Scale bars, 200  $\mu\text{m}$  (A) and 50  $\mu\text{m}$   
746 (C, D). CVP, cardinal vein plexus.  $\approx$ , unchanged *shha* expression; ↓, reduced *ptch1*  
747 expression.

748

749

750 **Figure 5. Excess estrogens promote EC migration in the common cardinal**  
751 **vein (CCV). (A-C)** EC migration analyses in the forming CCV of Ctl (A-B) and E2-  
752 treated (A'-B') embryos between 32-36 hpf. Three-dimensional rendering of  
753 endothelial LIFEACT-GFP (white) and nuclear NLS-mCherry (red) are shown.  
754 Migration paths (B-B') and parameters of individual ECs were analyzed (C). E2  
755 treatment significantly increase EC migration track length and displacement, but

756 reduce directionality. Aligned scattered plots  $\pm$  SEM are shown. Numbers in graphs  
757 indicate number of embryos analyzed. \*,  $p < 0.05$ ; \*\*\*\*,  $p < 0.0001$ . A, anterior; D,  
758 dorsal; CV, cardinal vein. Scale bars, 50  $\mu$ m.

759

760

761 **Figure 6. Increased PI3K and Rho GTPase signaling correlates with the**  
762 **vascular defects induced by excess estrogens. (A-A')** Maximum intensity  
763 projections (A) and quantification (A') of the effect of the PI3K inhibitor LY29002 on  
764 the E2-induced vascular defects at 48 hpf. PI3K inhibition significantly rescues the  
765 intersegmental vessel (ISVs) (white arrowheads), and dorsal aorta (DA) phenotypes  
766 (yellow arrowheads) induced by excess estrogens. Top panels, trunk vasculature  
767 anterior to the cloaca. Bottom panels, axial vessels between somites 22 and 26. **(B-**  
768 **B')** Quantification of the effect of focal adhesion kinase (FAK) and Rho GTPase  
769 inhibition on the E2-induced ISV **(B)** and DA **(B')** phenotypes at 48 hpf. FAK, Rac1  
770 and Rho inhibition significantly reduce the number of ISV defects in E2-treated  
771 embryos. Inhibition of Rac1, Cdc42 and Rho partially rescues the E2-induced DA  
772 phenotype. \*\*,  $p < 0.01$ ; \*\*\*,  $p < 0.001$ ; \*\*\*\*,  $p < 0.0001$ ; n.s., not significant. Scale bars,  
773 50  $\mu$ m. CVP, cardinal vein plexus.

774

775

776 **Figure 7. Esr1 receptor and Gper1 are the main drivers of the E2-induced**  
777 **vascular defects. (A)** Schematic representation of the zebrafish estrogen receptors  
778 and inhibitors. **(A')** Summary of the pharmacological approaches used to block  
779 estrogen signaling. **(B-B')** Maximum intensity projections (B) and quantification (B')  
780 of the impact of the pan-estrogen receptor inhibitor, ICI, on the E2-induced vascular  
781 phenotypes. Inhibition of nuclear estrogen receptor signaling partially rescues the  
782 intersegmental vessel (ISV, white arrowheads) and dorsal aorta (DA, yellow



783 arrowheads) defects induce by excess estrogens. **(C-C')** Quantification of the E2-  
784 induced vascular defects in 48 hpf *esr1*, *esr2a*, and *esr2b* mutants and wild-type  
785 siblings. Only *esr1*<sup>-/-</sup> embryos are partially protected against the E2-induced vascular  
786 defects. **(D-D')** Maximum intensity projections (D) and quantification (D') of the effect  
787 of G36 on the E2-induced vascular phenotype. Selective Gper1 inhibition partially  
788 rescues the number ISV (white arrowheads) and DA (yellow arrowheads) phenotype  
789 induced by E2 treatment. Top panels in (B) and (D), trunk vasculature anterior to the  
790 cloaca. Bottom panels in (B) and (D), axial vessels between somites 22 and 26. \*,  
791 p<0.05; \*\*, p<0.01; \*\*\*, p<0.001; \*\*\*\*, p<0.0001. Scale bars, 50 μm. CVP, cardinal  
792 vein plexus.

793

794

795 **Figure 8. Gper1 can cell-autonomously induce EC disconnections during**  
796 **angiogenesis. (A-F')** Maximum intensity projections of endothelial mosaic  
797 overexpression of estrogen receptors. Endothelial overexpression of *gper1* induces  
798 cell-cell disconnections during developmental angiogenesis. Disconnected ECs  
799 locate to the dorsal side of the embryo (white arrowheads in (B-B')). No overt  
800 vascular phenotypes were observed in control embryos (A-A'), or in embryos  
801 overexpressing *esr1-CA* (C-C'), wild-type *esr1* (D-D'), *esr2a* (E-E') or *esr2b* (F-F') in  
802 ECs. Scale bars, 25 μm. Number of embryos analyzed are shown. DA, dorsal  
803 aorta. ISV, intersegmental vessel.

804

805

806

807 **Movie 1A. ISV formation and stabilization in control embryos. Related to**  
808 **Figure 1D.** Time-lapse images of the posterior region of the trunk vasculature were  
809 acquired every 20 min between 29 and 44 hpf. Negative LIFEACT-GFP (black) and  
810 NLS-mCherry (red) expression are shown. ISVs extend and reach the dorsal side of  
811 the embryo to start forming the DLAV. Once they have migrated dorsally, ISVs are  
812 stabilized and lumen formation starts. Scale bar, 20  $\mu$ m.

813

814 **Movie 1B-C. ISV defects in E2-treated embryos due to EC disconnections.**  
815 **Related to figure 1D'.** Time-lapse images of the posterior region of the trunk  
816 vasculature were acquired every 20 min between 29 and 44 hpf. Negative LIFEACT-  
817 GFP (black) and NLS-mCherry (red) expression are shown. The extension of the  
818 ISVs and formation of the DLAV are delayed in E2-treated embryos. Fully extended  
819 ISVs undergo stenosis and disconnect from the dorsal aorta (DA) or the DLAV.  
820 Scale bar, 20  $\mu$ m.

821

822 **Movie 2A. Extension of the DA lumen in control embryos. Related to Figure**  
823 **2C.** Time-lapse images of the posterior region of the trunk vasculature were  
824 acquired every 20 minutes between 28 and 43 hpf. Negative LIFEACT-GFP  
825 expression in ECs is shown. The DA is pseudocolored in red. Two representative  
826 cells are rendered in green to highlight cell shape changes during lumen extension  
827 within the DA. Scale bar, 20  $\mu$ m.

828

829 **Movie 2B. Premature truncation of the lumenized DA in E2-treated embryos.**  
830 **Related to Figure 2C'.** Time-lapse confocal images of the posterior region of the  
831 trunk vasculature of embryos treated with E2 were acquired between 30 and 43 hpf.  
832 Negative LIFEACT-GFP expression in ECs is shown. The DA is pseudocolored in  
833 red. Two cells detaching from anterior neighbors and migrating to the posterior

834 region of the DA are rendered in yellow and blue. Detachment of these cells from  
835 the DA leads to a premature truncation of the circulatory loop. Scale bar, 20  $\mu\text{m}$ .

836

837 **Movie 3A. EC migration in the forming CCV in control embryos. Related to**

838 **Figure 5 (A-B).** Time-lapse confocal images of the forming CCV in control

839 *LIFEACT-GFP;NLS-mCherry* embryos between 32-36 hpf. Images were acquired

840 every 15 min. LIFEACT-GFP expression is rendered in white and NLS-mCherry in

841 red. Migration tracks of individual ECs are shown (white lines). Scale bar, 50  $\mu\text{m}$ .

842

843 **Movie 3B. EC migration in the forming CCV in E2-treated embryos. Related to**

844 **Figure 5A'-B'.** Time-lapse confocal images of the forming CCV in E2-treated

845 *LIFEACT-GFP;NLS-mCherry* embryos between 32-36 hpf. Images were acquired

846 every 15 min. LIFEACT-GFP expression is rendered in white and NLS-mCherry in

847 red. Migration tracks of individual ECs are shown (white lines). EC nuclei and

848 migration tracks of representative cells with decreased migration directionality are

849 rendered in blue. Scale bar, 50  $\mu\text{m}$ .

850

## FIGURE 1

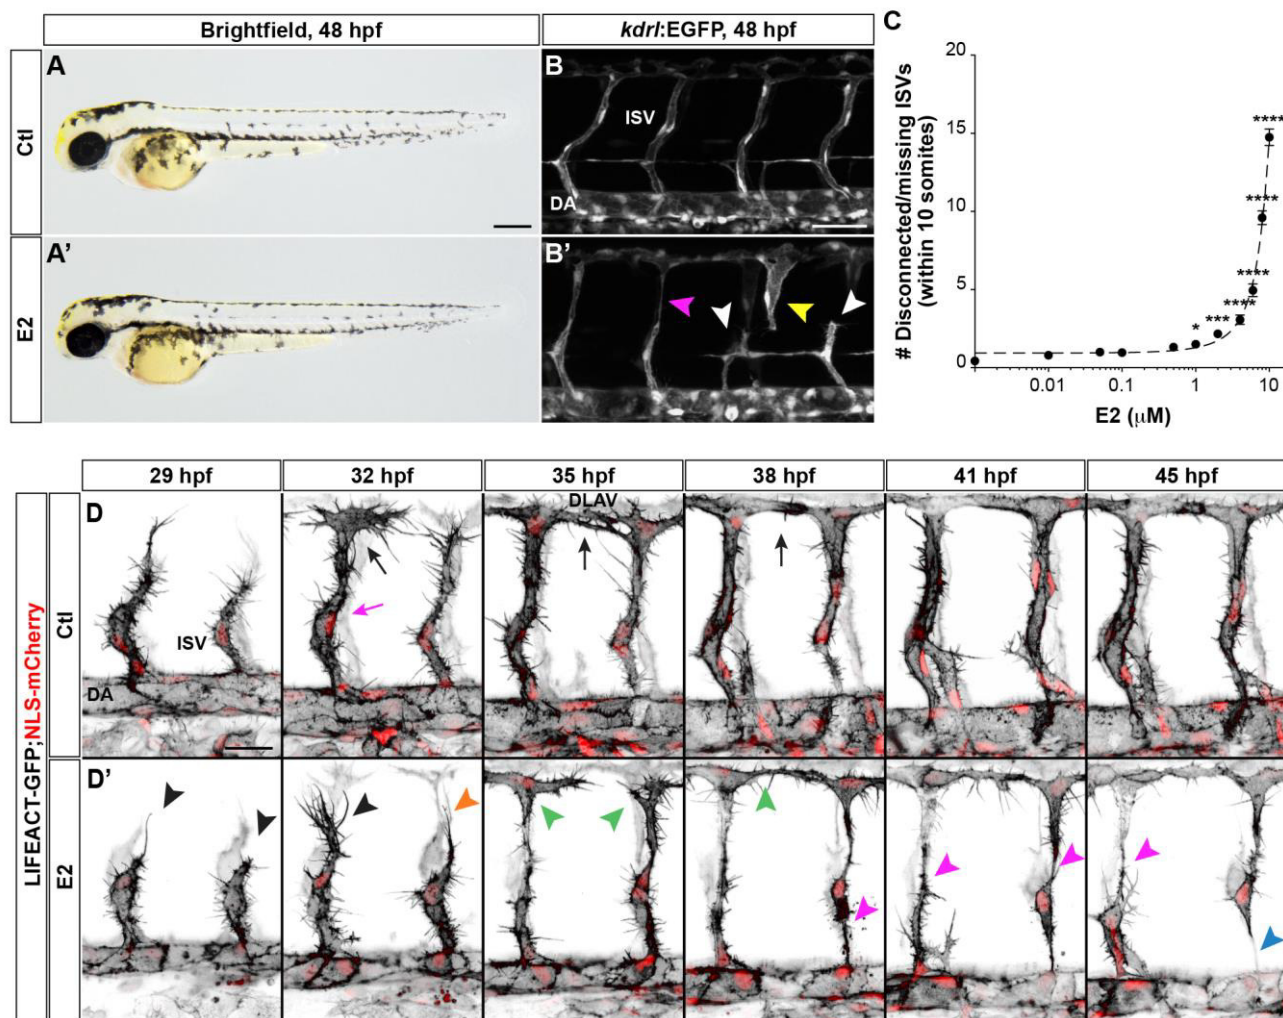

## FIGURE 2

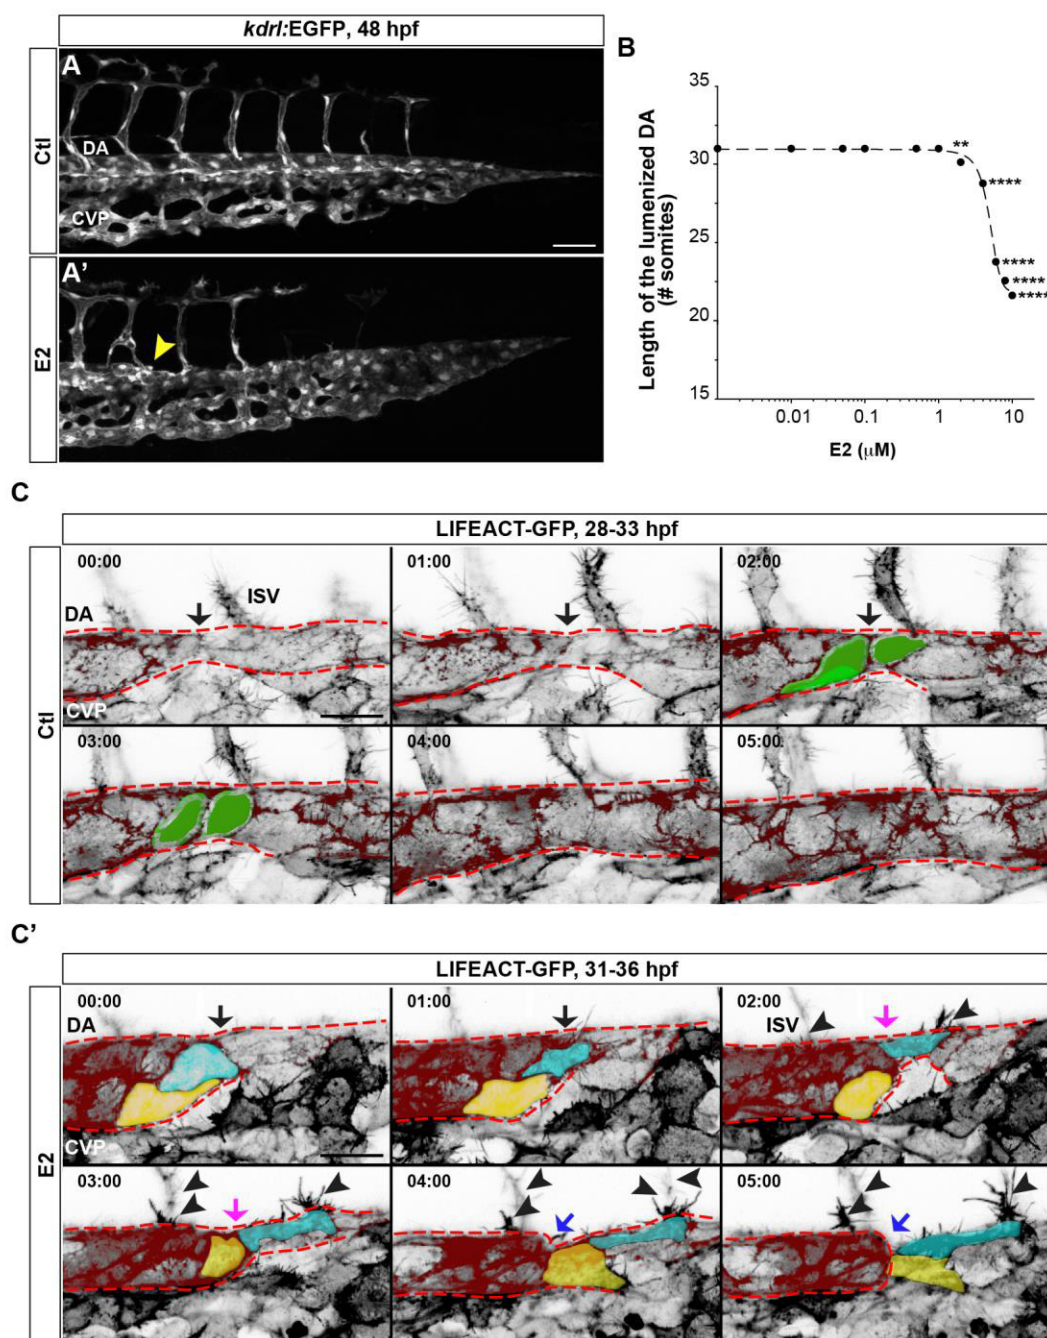



## FIGURE 3

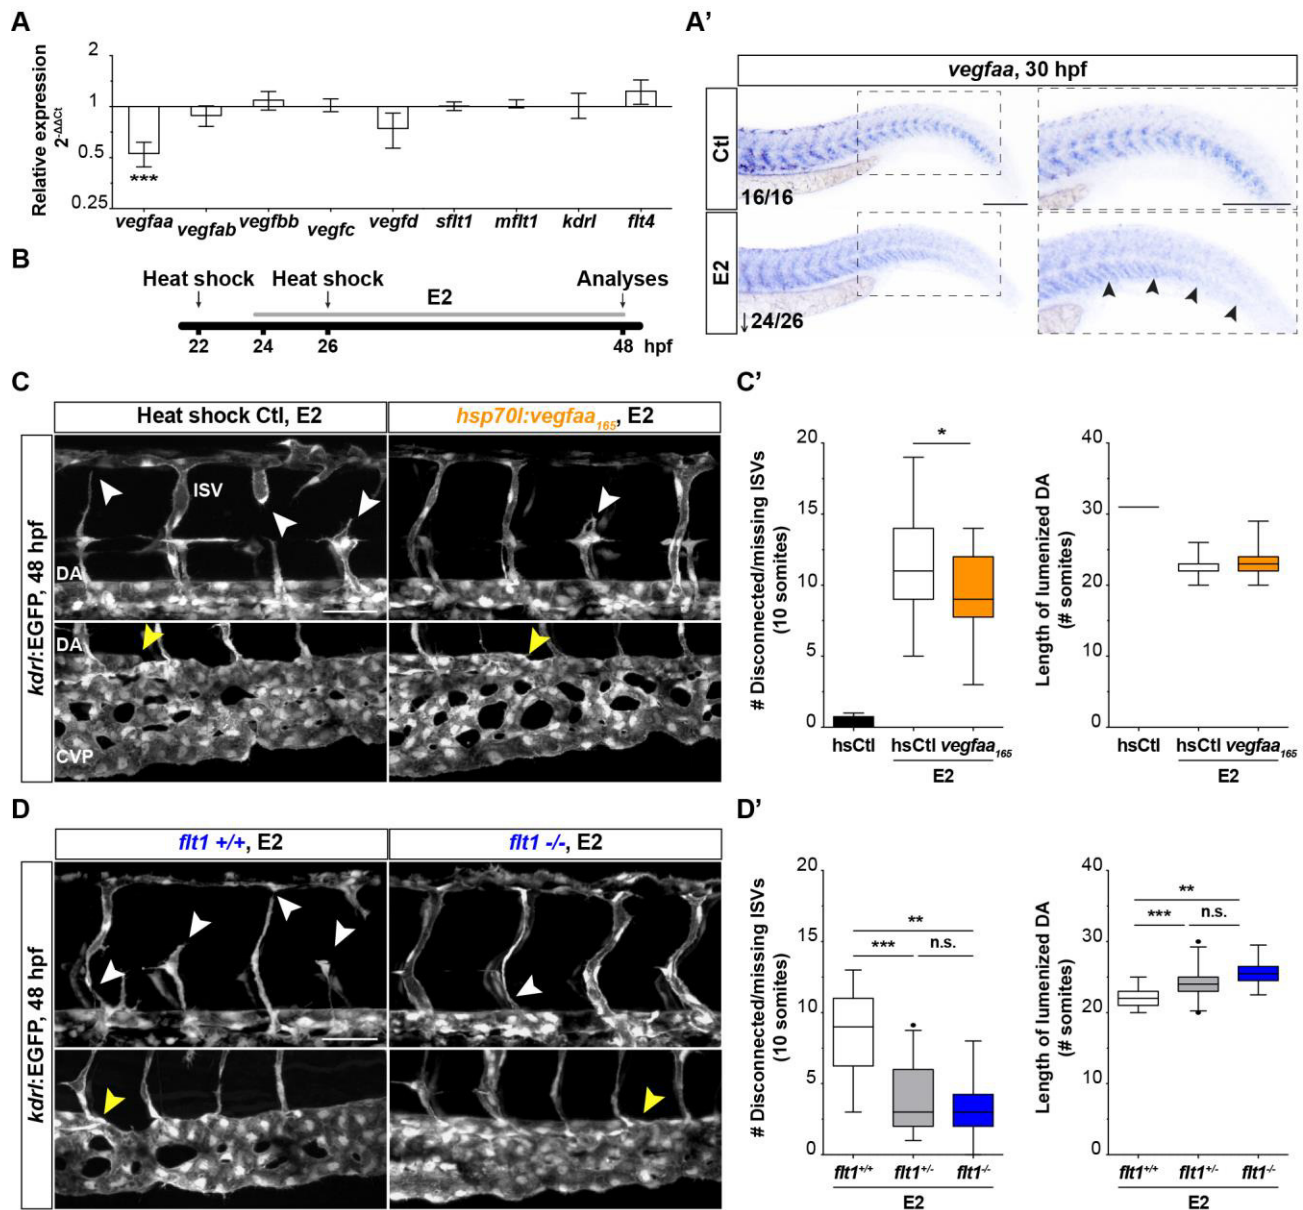

## FIGURE 4

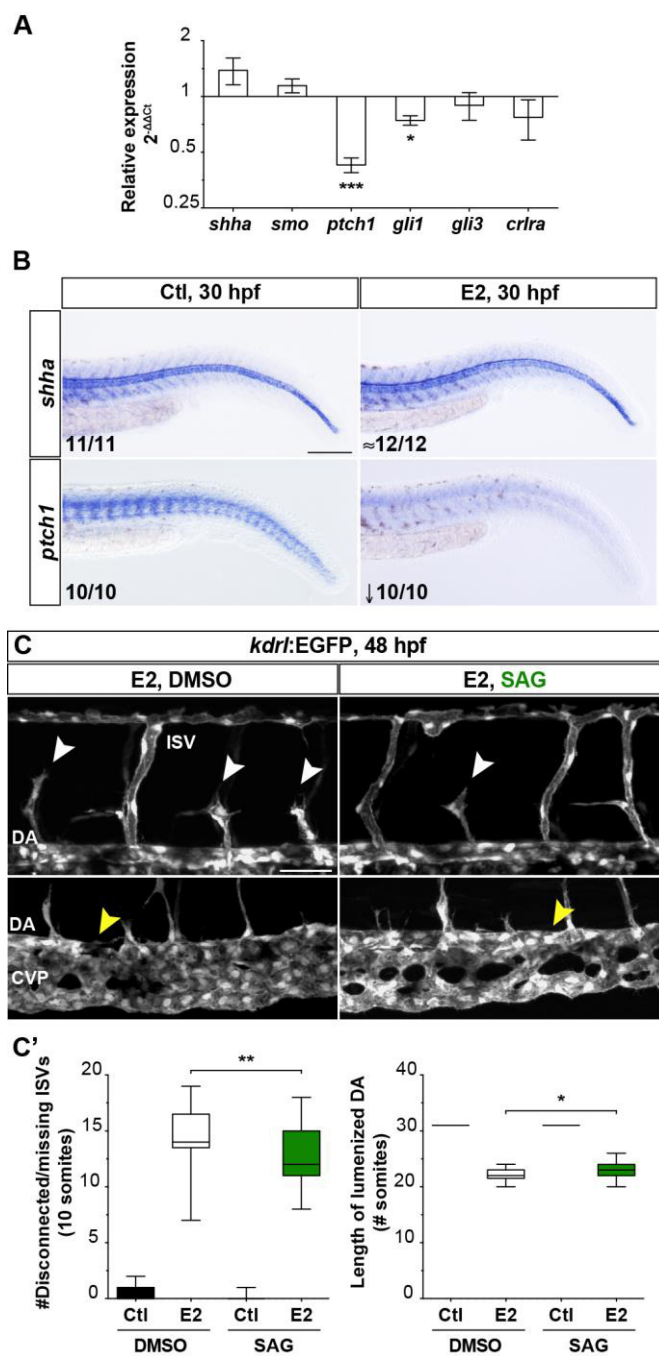

## FIGURE 5

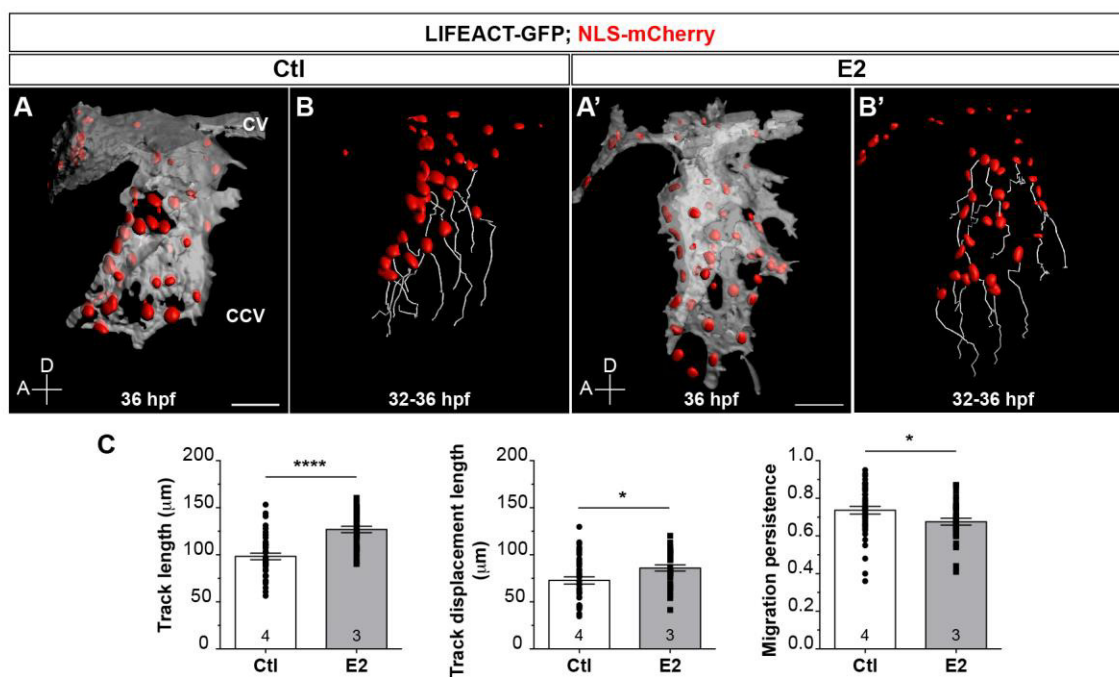



## FIGURE 6

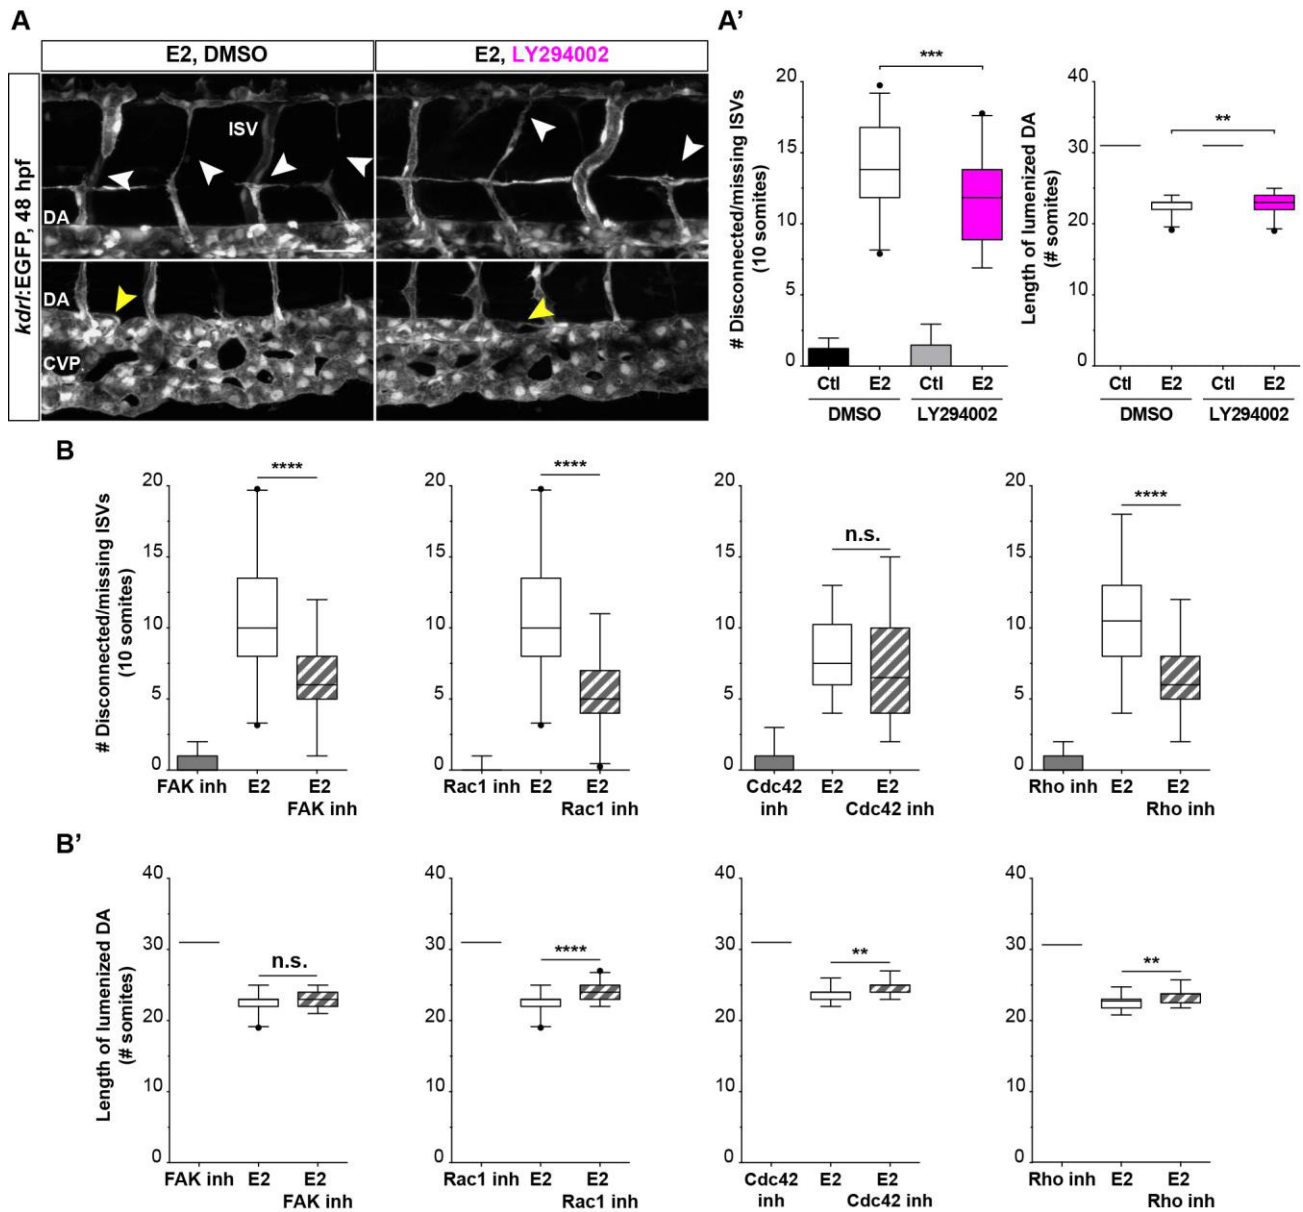

## FIGURE 7

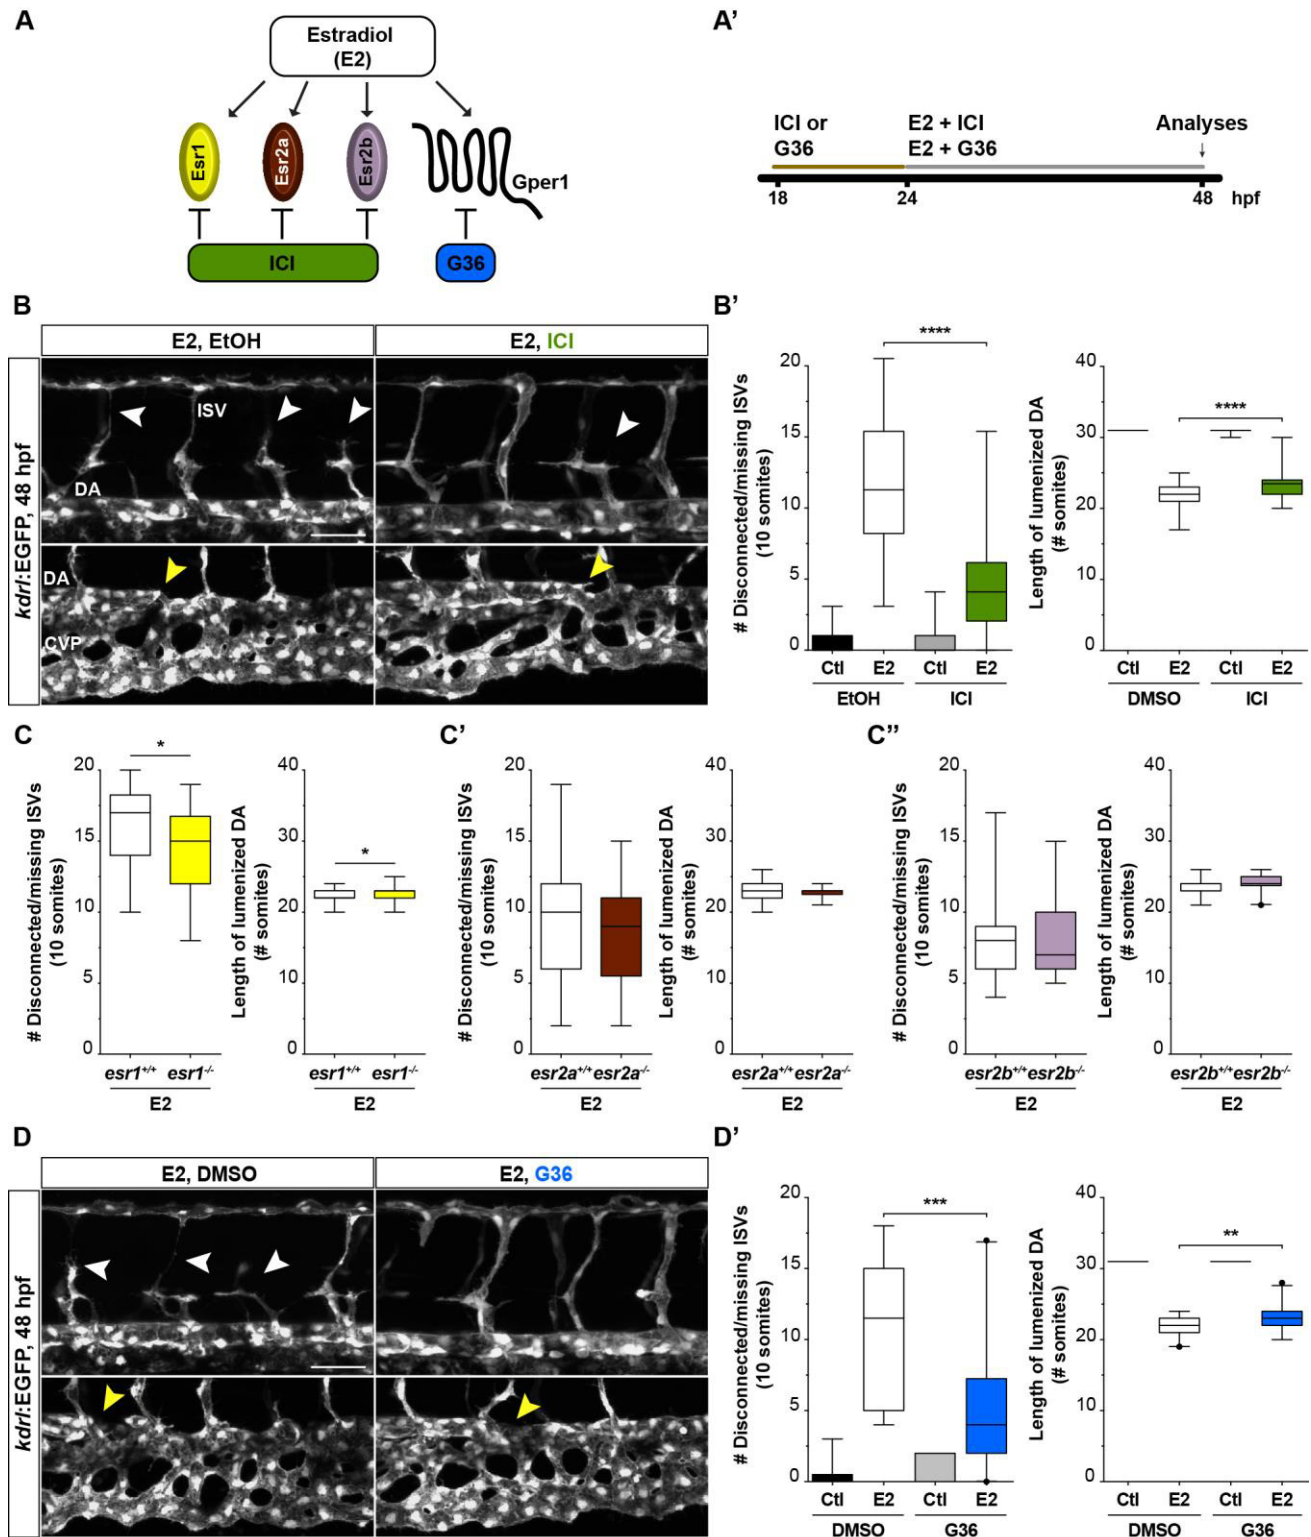

## FIGURE 8

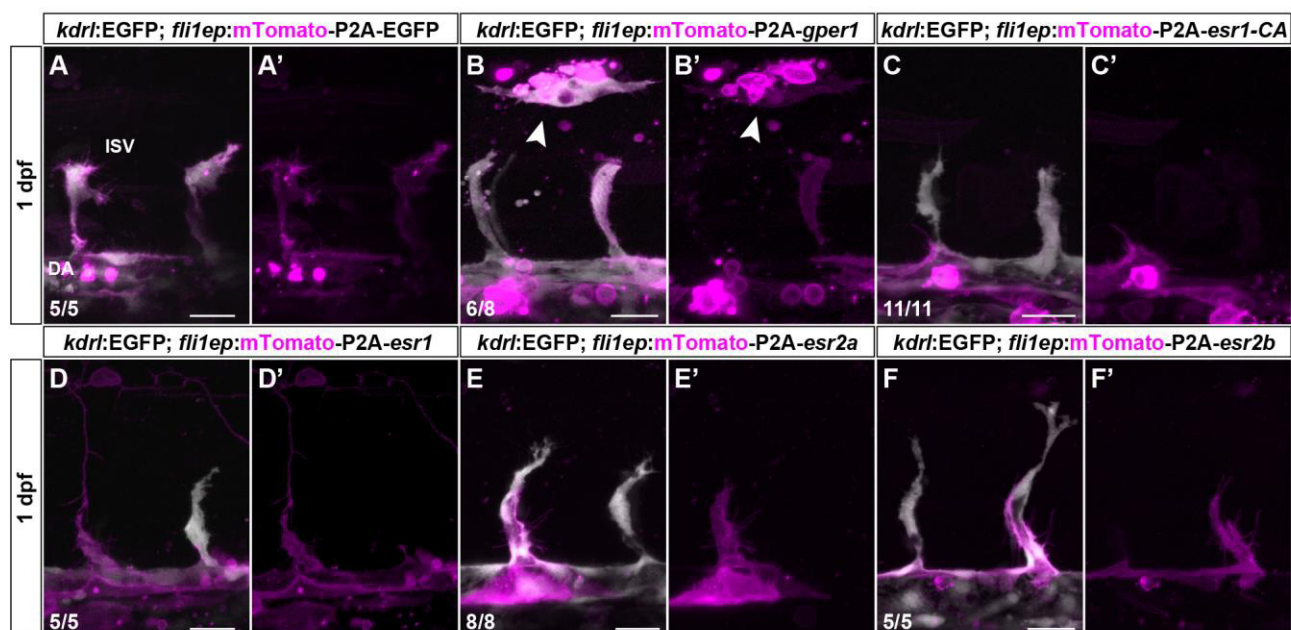

Source: https://www.biorxiv.org/content/early/2018/05/11/320234.full.pdf
